# Supplementary material
Source: publisher figshare collection journal article supplement (https://sage.figshare.com/ndownloader/files/18238451)
Supplement: Supplementary file 1 [file 18238451]

## Supplementary figures and figure legends

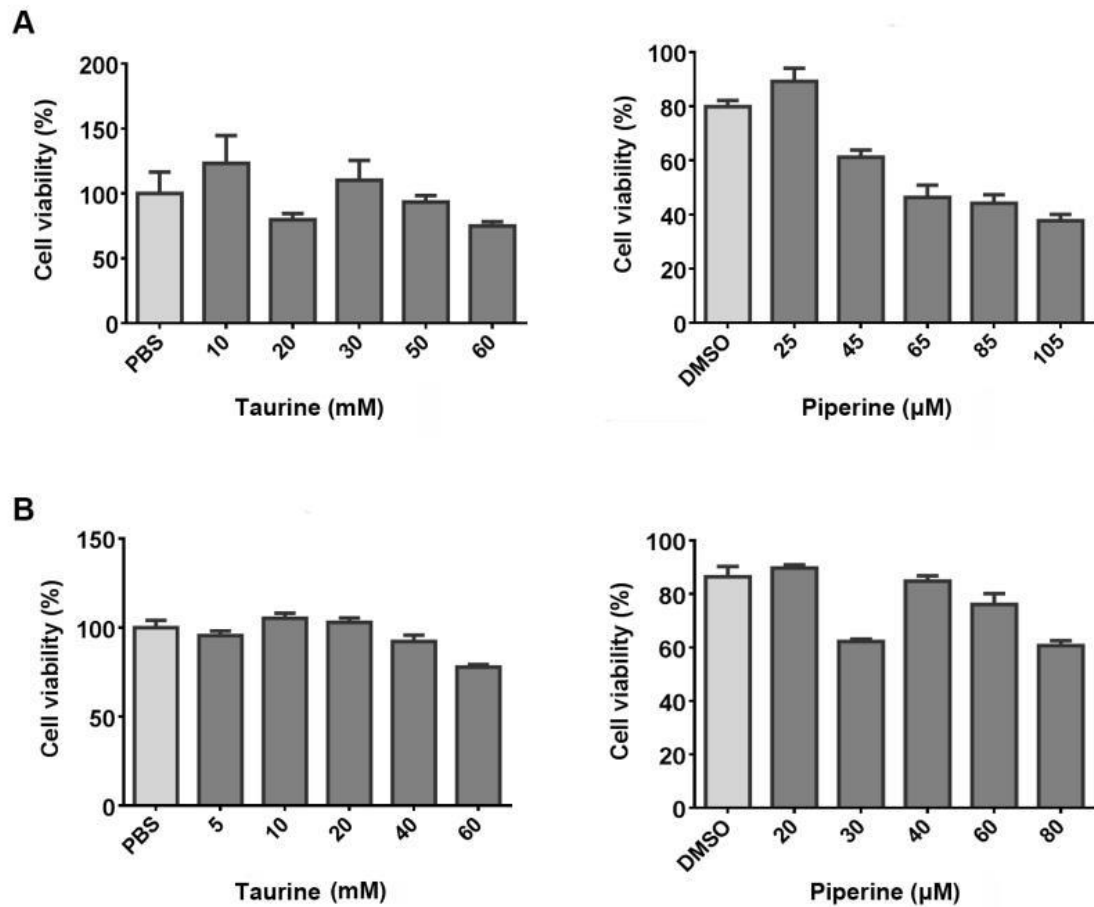

**Supplementary Figure 1. The effect of taurine and piperine on the viability of HELF cells.**

(A) HELF cells were treated with taurine (10–60 mM), piperine (25–105  $\mu$ M), or DMSO (vehicle control) for 24 h and cell viability was measured using an MTT assay. (B) HELF cells were treated with taurine (5–60 mM), piperine (20–80  $\mu$ M), or DMSO (vehicle control) for 48 h and cell viability was measured using an MTT assay.

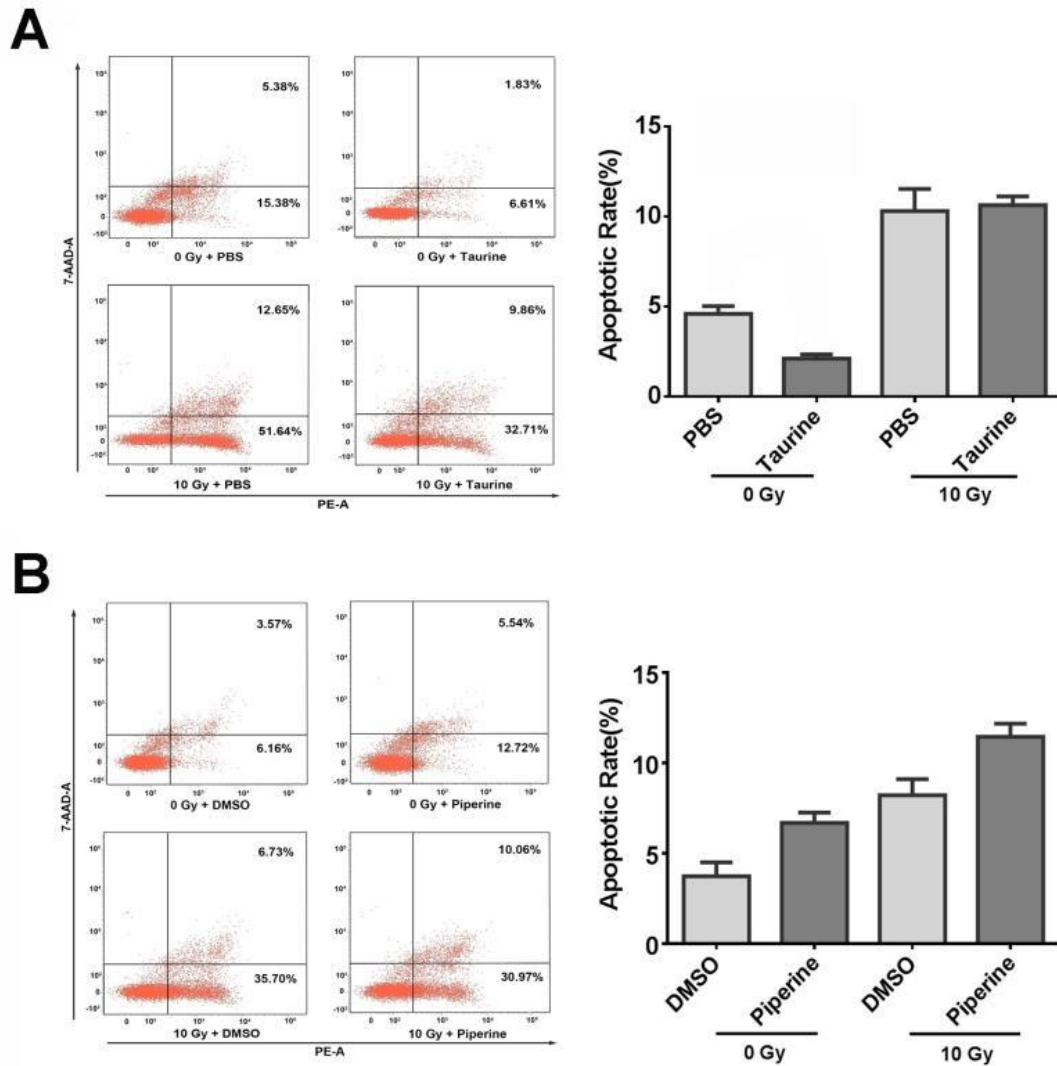

**Supplementary Figure 2. The effect of taurine and piperine on the radiation-induced cell apoptosis of HELF cells.**

(A) **Cell apoptosis assay.** HELF cells were pretreated with taurine (10 mM) followed by 10 Gy ionizing radiation. (B) **Cell apoptosis assay.** HELF cells were pretreated with piperine (30  $\mu$ M) followed by 10 Gy ionizing radiation.
